# Supplementary material
Source: PubMed Central journal article supplement (PMC4007494)

## Supporting Information

# Pharmacophore-Based Virtual Screening versus Docking-Based Virtual Screening: a Benchmark Comparison against Eight Targets

Zhi Chen<sup>a</sup>, Honglin Li<sup>b,\*</sup>, Qijun Zhang<sup>a</sup>, Xiaoguang Bao<sup>a</sup>, Kunqian Yu<sup>a</sup>, Xiaomin Luo<sup>a</sup>,  
Weiliang Zhu<sup>a</sup>, Hualiang Jiang<sup>a,b,\*</sup>

<sup>a</sup> Center for Drug Discovery and Design, State Key Laboratory of Drug Research, Shanghai Institute of Materia Medica, Chinese Academy of Sciences, Shanghai 201203, China

<sup>b</sup> School of Pharmacy, East China University of Science and Technology, Shanghai 200237, China.

## Supporting Methods

The detailed procedure of virtual screening using DOCK, GOLD and Glide is described below.

**DOCK.** For each target, the Connolly molecular surface was calculated with a probe radius of 1.4 Å. The residues around the co-crystallized ligand within 6 Å were defined as binding site with Sybyl 6.8. Within the binding site, spheres were generated therein with the SPHGEN program encoded in DOCK4.0. SPHGEN output the spheres in clusters. Cluster 1 was selected for each target. Compounds in the databases were docked into the binding site, allowing for ligand flexibility, using the grid-based energy scoring option for minimization after initial placement in the site. The box for the scoring grid was defined such that all spheres were enclosed with an extra 7 Å added in each dimension. Scoring grids for contact and energy scores were calculated with a grid spacing of 0.3 Å. The bump check was set such that atoms closer than 75 percent of the van der Waals radii of the respective atoms were rejected. A 6-12 Lennard-Jones van der Waals potential was used along with a Coulomb potential using a distance-dependent dielectric coefficient of 4 to simulate solvation effects. The energy cutoff was set to 10 Å. The radii used were those in the vdw.defn set.

**GOLD.** The GOLD docking program of Version 3.1 was evaluated in this study. The active site was defined to encompass any protein atom included in a 10-Å-radius sphere centered on the mass of the co-crystallized ligand in the complex structure. 7-8 times speedup setting was selected in virtual screening. All the variable parameters were set as the default values. The compounds were flexibly docked into the binding site of the targets, and the pose with the best GoldScore for each compound was adopted.

**Glide.** The Glide of version 4.0 was used to screen the databases. Target protein protonation was performed with the pprep script in Glide. Glide constructed a grid that defined the ligand-binding site search region, which was centered on the co-crystallized ligand in the complex structure. The grid was defined as an enclosing box with 15 Å in all three dimensions. The standard precision (SP) docking mode was selected. The ligands in the MOL2 format in databases were transformed into MAE format with mol2convert utility encoded in the program, and then docked flexibly into the binding site. The pose with the best GlideScore for each ligand was saved for further analysis.

## Supporting Tables and Figures

**Table S1.** Chemical Structures of the Actives Used in This Study. The DrugBank Numbers Were Used to Name the Actives.

| Compound   | Structure                                                                           | Compound | Structure                                                                           | Compound | Structure                                                                             |
|------------|-------------------------------------------------------------------------------------|----------|-------------------------------------------------------------------------------------|----------|---------------------------------------------------------------------------------------|
| <b>ACE</b> |                                                                                     |          |                                                                                     |          |                                                                                       |
| DB00178    | 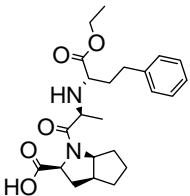   | DB00519  |    | DB00584  |    |
| DB00492    |   | DB00542  |   | DB00691  |   |
| DB00790    |  | DB00881  |  | DB01089  |  |
| DB02032    |  | DB04184  |  | DB03740  |  |
| DB01180    |  | DB01348  |  |          |                                                                                       |

Table S1 (continued)

AChE

|         |                                                                                     |         |                                                                                     |         |                                                                                       |
|---------|-------------------------------------------------------------------------------------|---------|-------------------------------------------------------------------------------------|---------|---------------------------------------------------------------------------------------|
| DB00122 | 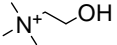   | DB00483 |    | DB00545 |    |
| DB00572 |    | DB00677 |    | DB00772 |    |
| DB00944 |   | DB00981 |    | DB01400 |    |
| DB00989 |  | DB03166 |  | DB01122 |  |
| DB01199 |  | DB01364 |  | DB02226 |  |
| DB01805 |  | DB02166 |  | DB03005 |  |
| DB03672 |  | DB03283 |  | DB03814 |  |

Table S1 (continued)

DB03740

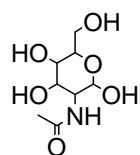

AR

DB00499

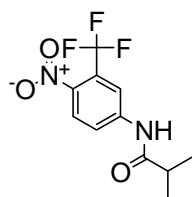

DB00621

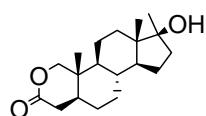

DB02901

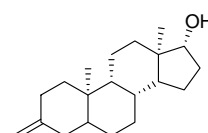

DB00665

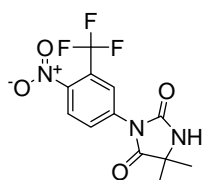

DB00858

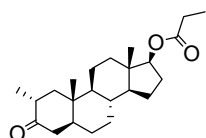

DB00984

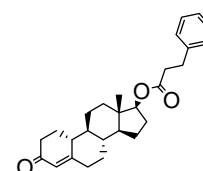

DB01185

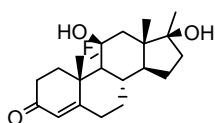

DB01216

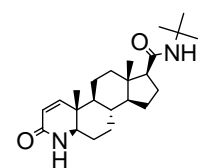

DB04839

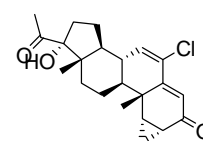

DB01481

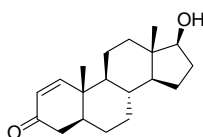

DB01541

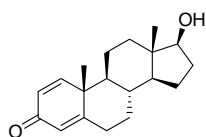

DB02998

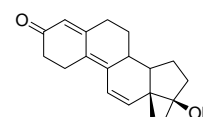

DB04709

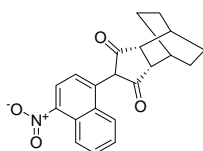

DB01564

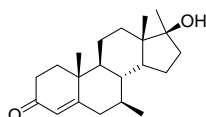

DB02932

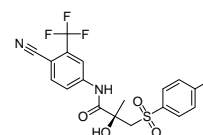

DB02478

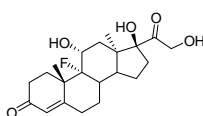

Table S1 (continued)

DacA

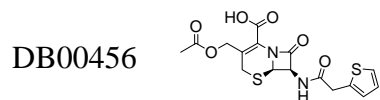

DB03313

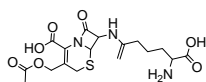

DB04488

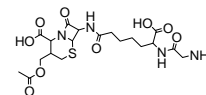

DR

DB00205

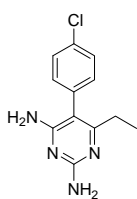

DB00250

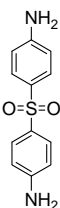

DB00440

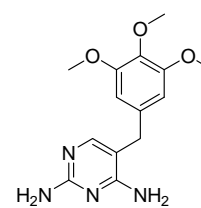

DB00555

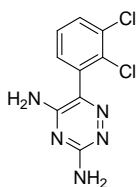

DB00642

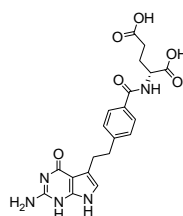

DB01131

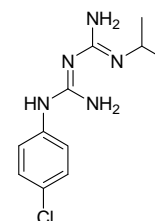

DB01157

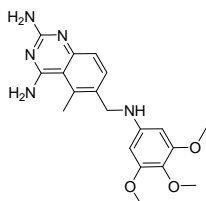

DB02559

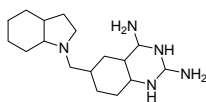

ER

DB00269

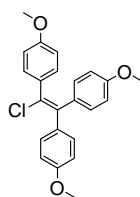

DB00286

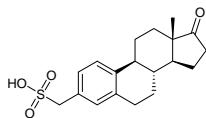

DB00304

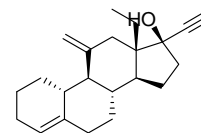

DB00294

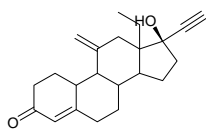

DB00351

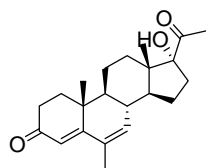

DB00367

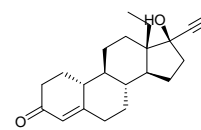

**Table S1 (continued)**

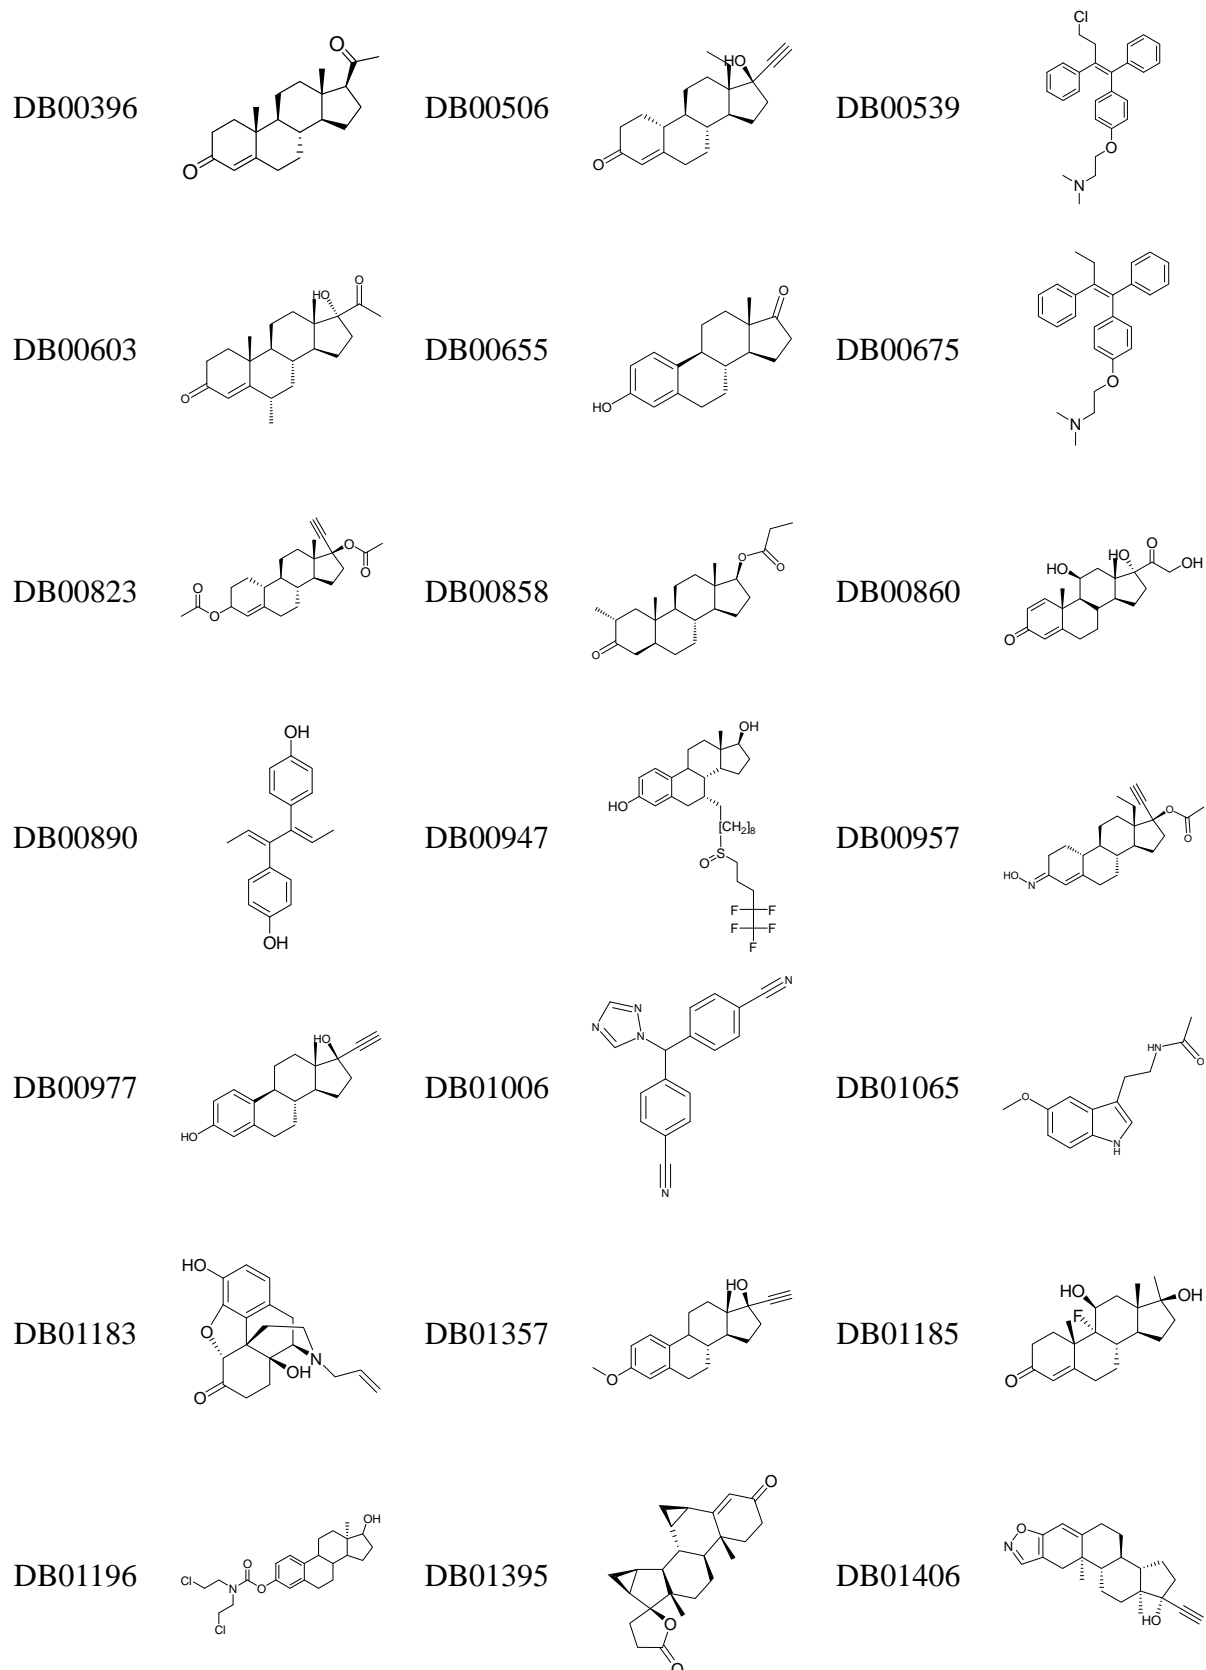



**Table S1 (continued)**

DB03742

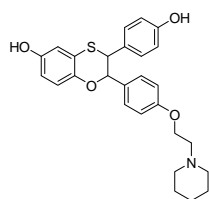

DB03802

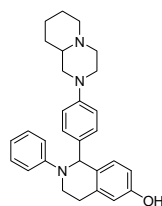

DB04573

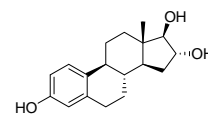

DB04575

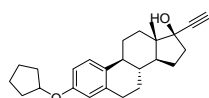

DB00882

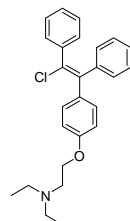

### HIV-pr

DB00220

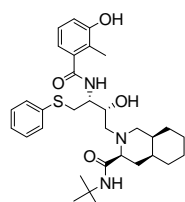

DB00701

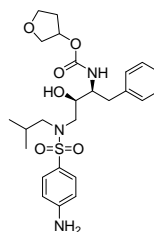

DB00224

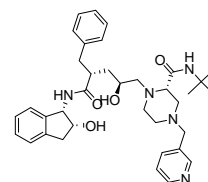

DB00932

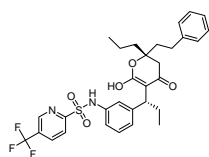

DB00503

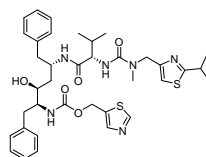

DB01072

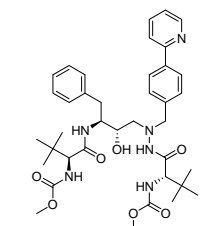

DB01319

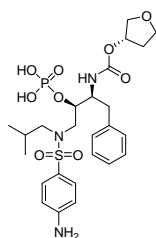

DB01601

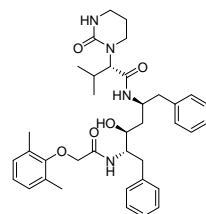

DB02785

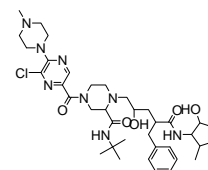

### TK

DB00194

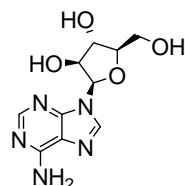

DB00299

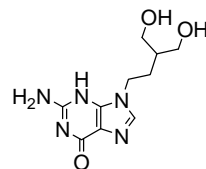

DB00432

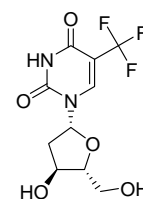



**Figure S1.** Refined pharmacophore models for the eight targets represented in Catalyst form: hydrogen bond acceptor (HBA), hydrogen bond donor (HBD), hydrophobic (HP), and excluded volume (gray sphere).

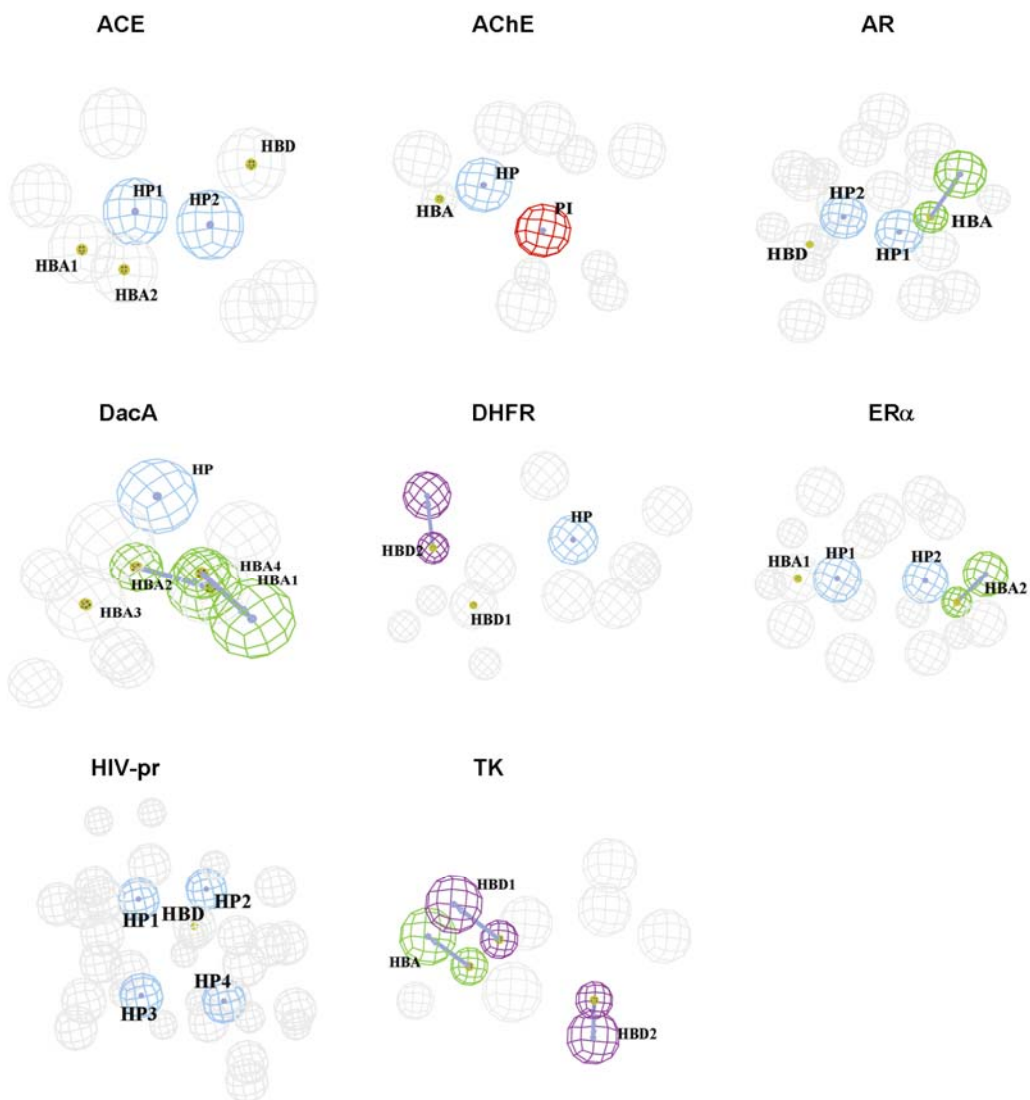

**Figure S2.** Actives mapping to the pharmacophore model and fitting to the binding pocket of ACE. Actives in the 5% of the highest ranks of the entire database produced by the pharmacophore-based method were used in the mapping and fitting. Pharmacophore model was represented in Catalyst form: hydrogen bond acceptor (HBA, green), hydrogen bond donor (HBD, purple), hydrophobic group (HP, cyan), and excluded volume (EV, gray). Binding conformations of the actives were isolated from the results of virtual screens. Actives in the docking models were represented in stick model. Ligand bound in the crystal structure was used as reference molecule (white), and actives docked by DOCK, GOLD and Glide were displayed in red, green, and blue colors, respectively.

**A**

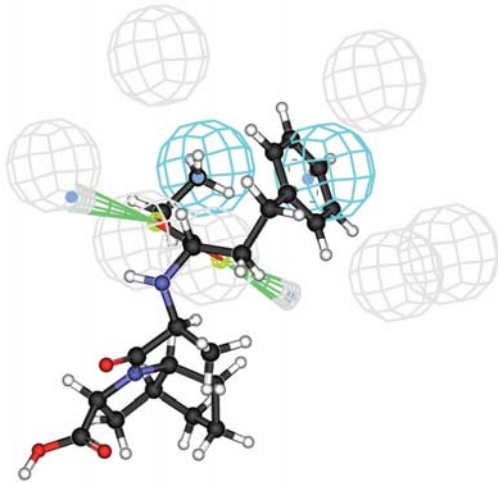

DB00178 Fit=3.38

**B**

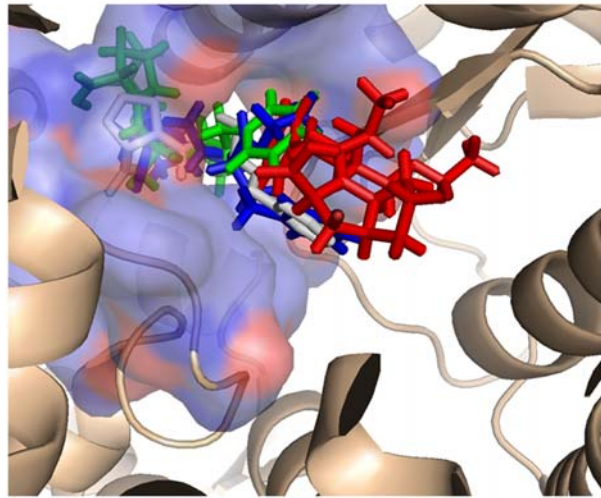

**C**

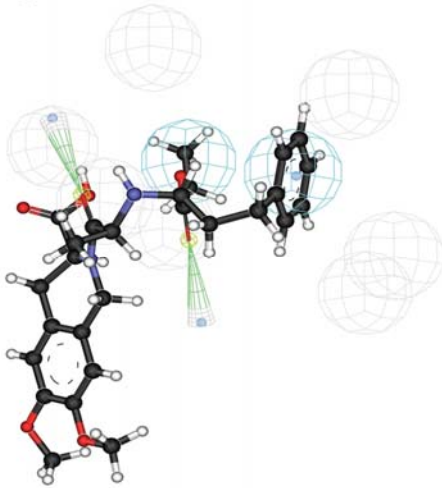

DB00691 Fit=3.33

**D**

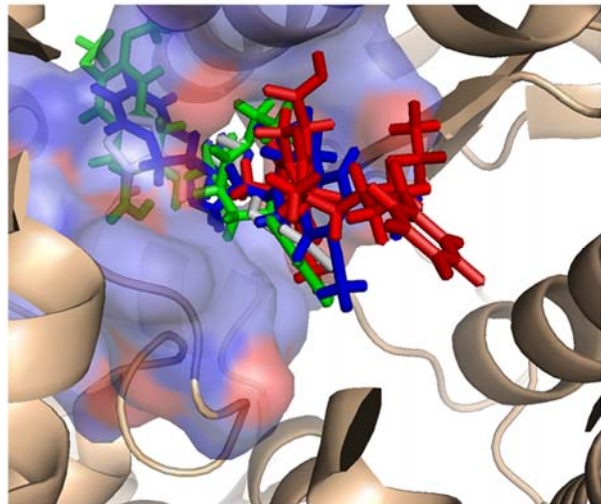

**E**

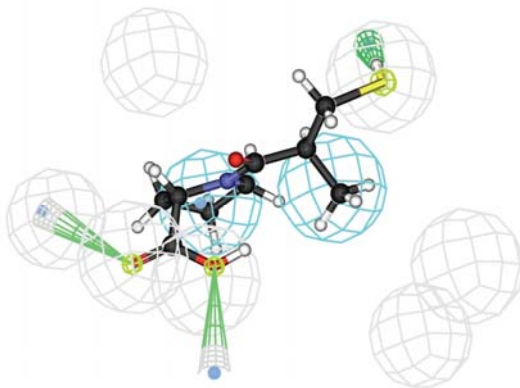

DB02032 Fit=3.79

**F**

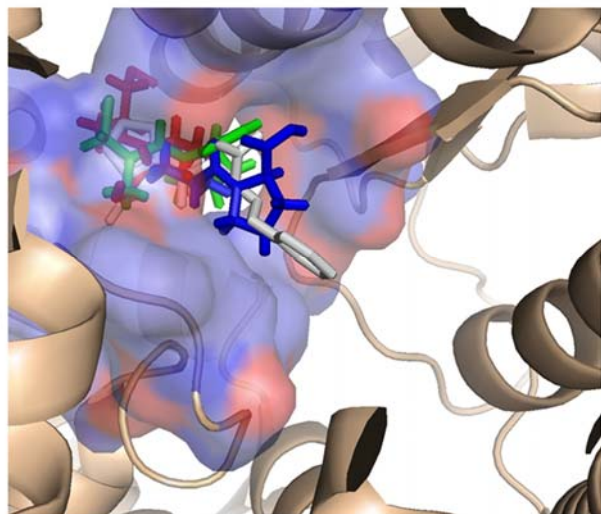

**Figure S3.** (A) Structural superposition of ACE actives after pharmacophore mapping and binding pocket fitting. The conformation of the actives predicted by DOCK (B), GOLD (C), and Glide (D) are also displayed.

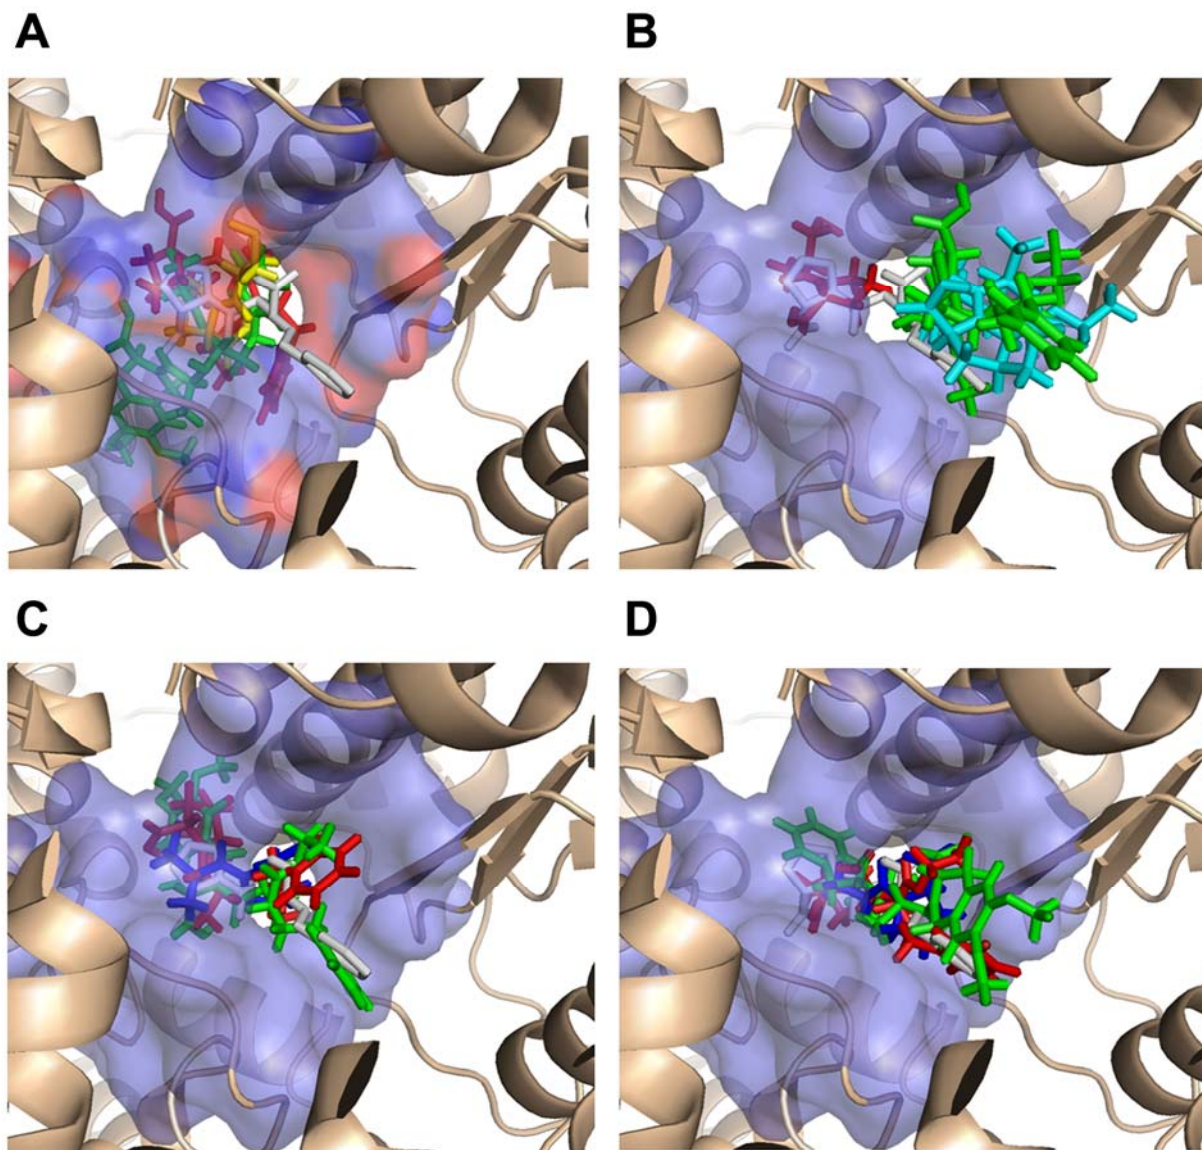

**Figure S4.** Actives mapping to the pharmacophore model and fitting to the binding pocket of AChE. The figure caption is the same as Figure S2.

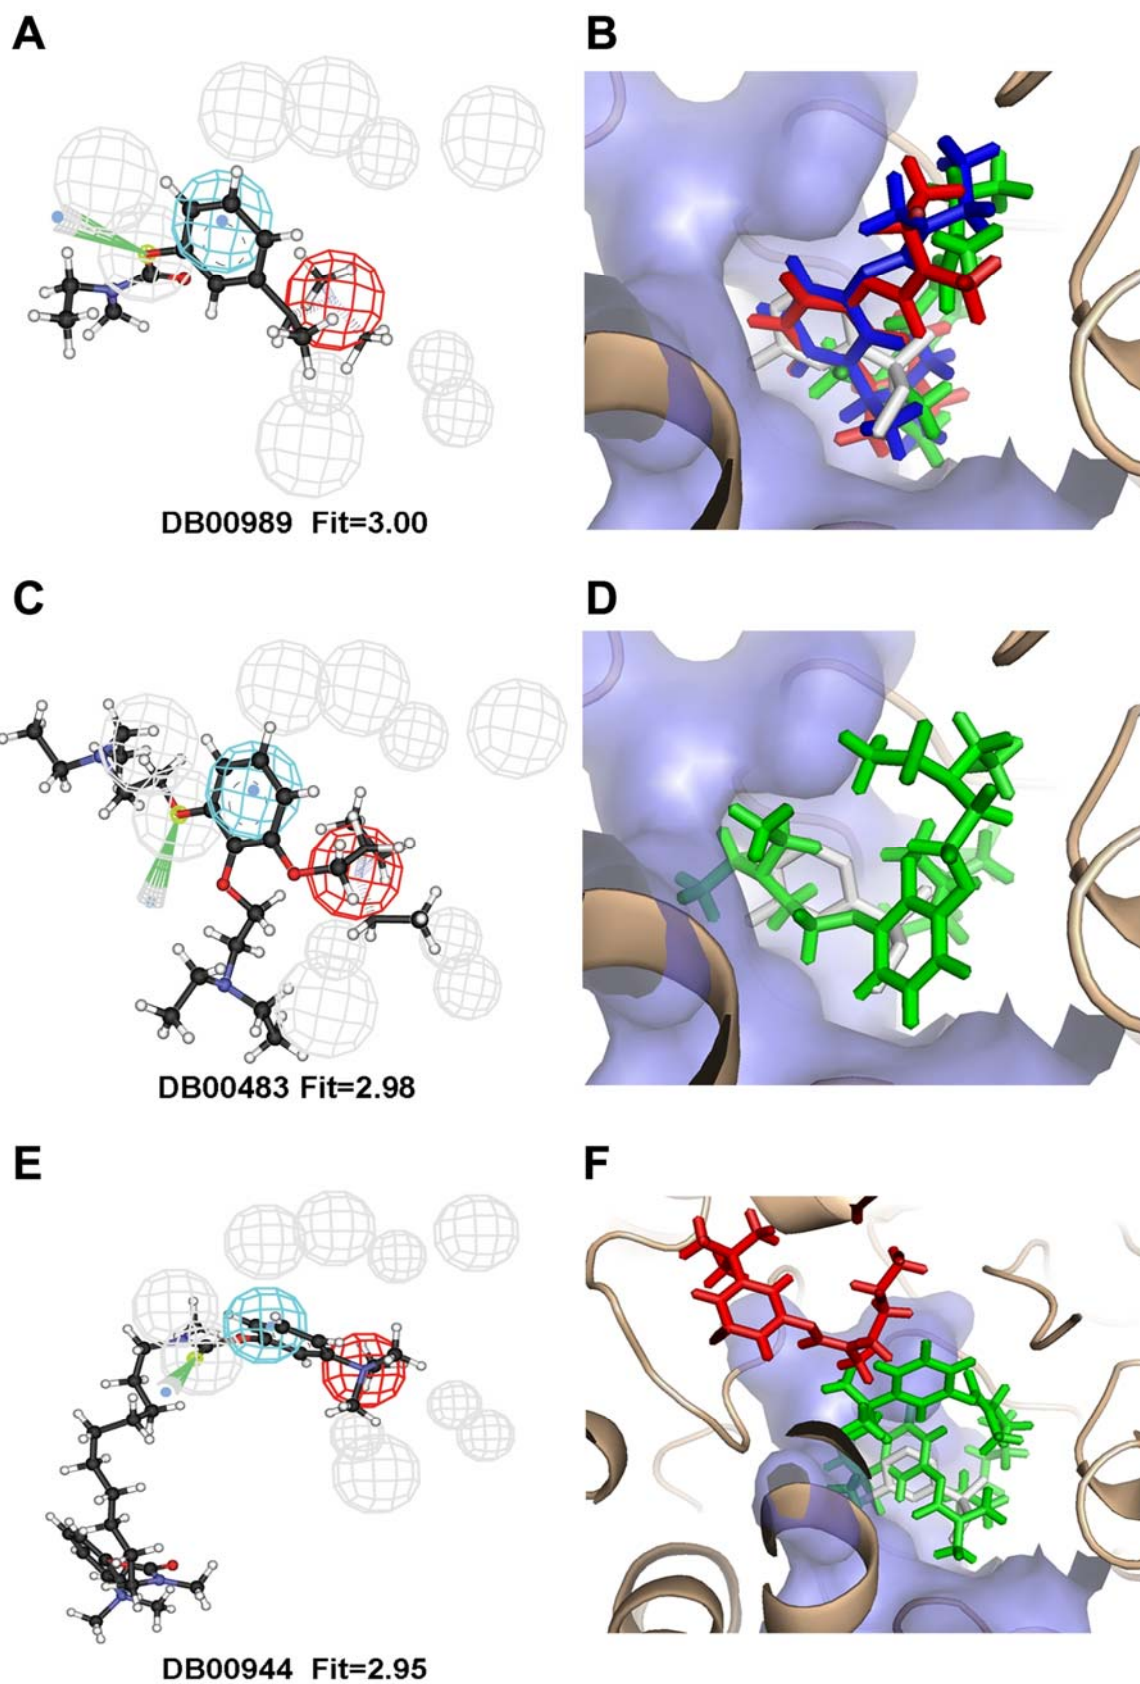

Figure S4 (continued)

**G**

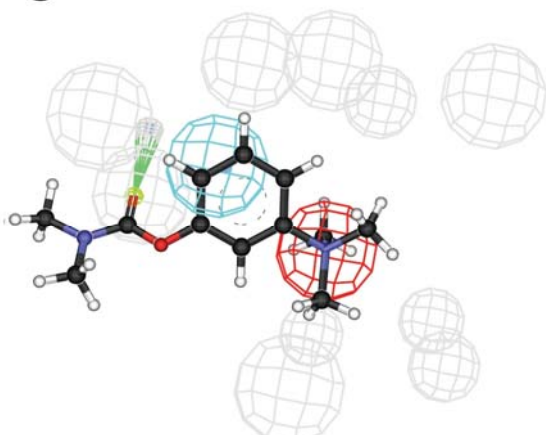

DB01400 Fit=2.94

**H**

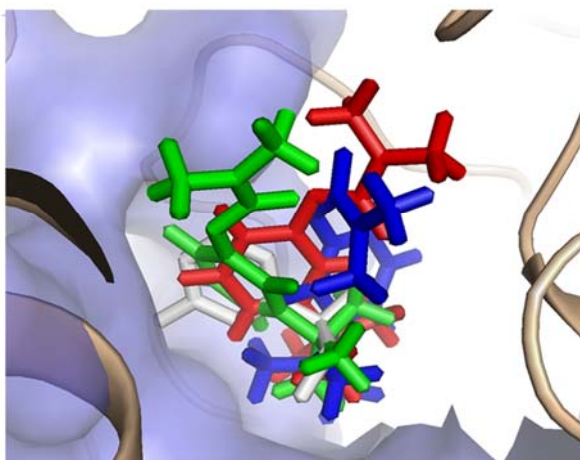

**I**

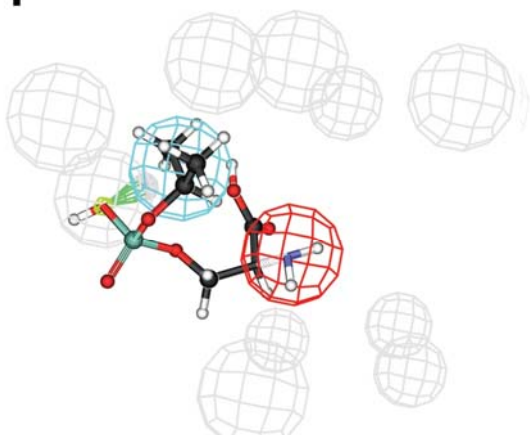

DB01805 Fit=2.84

**J**

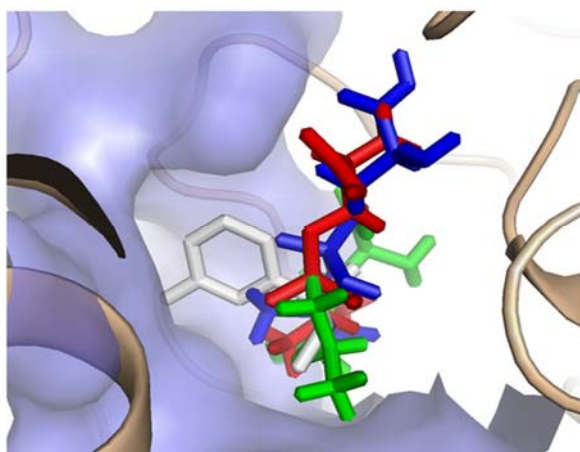

**K**

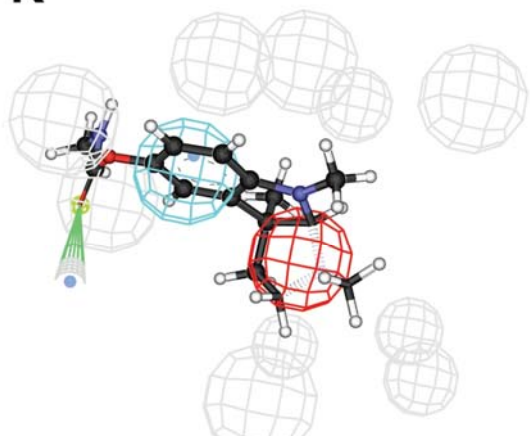

DB00981 Fit=2.13

**L**

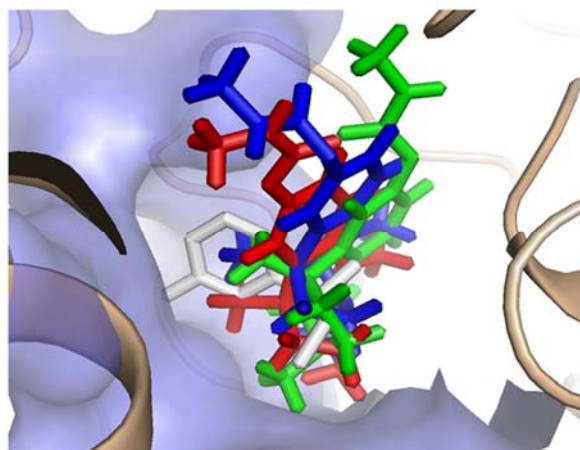



**Figure S5.** Structural superposition of AChE actives after pharmacophore mapping and binding pocket fitting. The figure caption is the same as Figure S3.

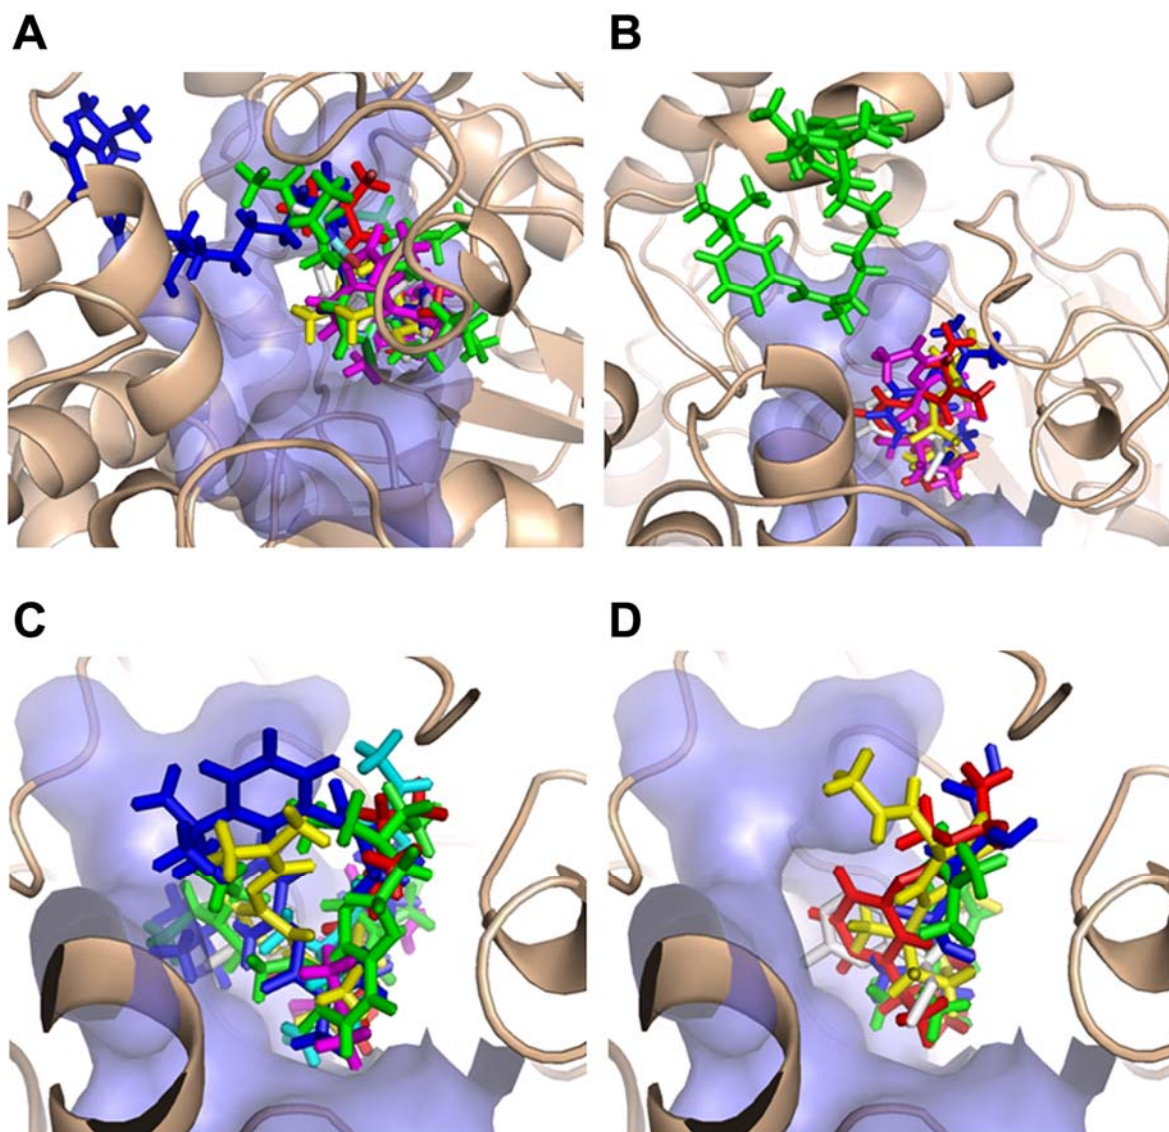

**Figure S6.** Actives mapping to the pharmacophore model and fitting to the binding pocket of AR. The figure caption is the same as Figure S2.

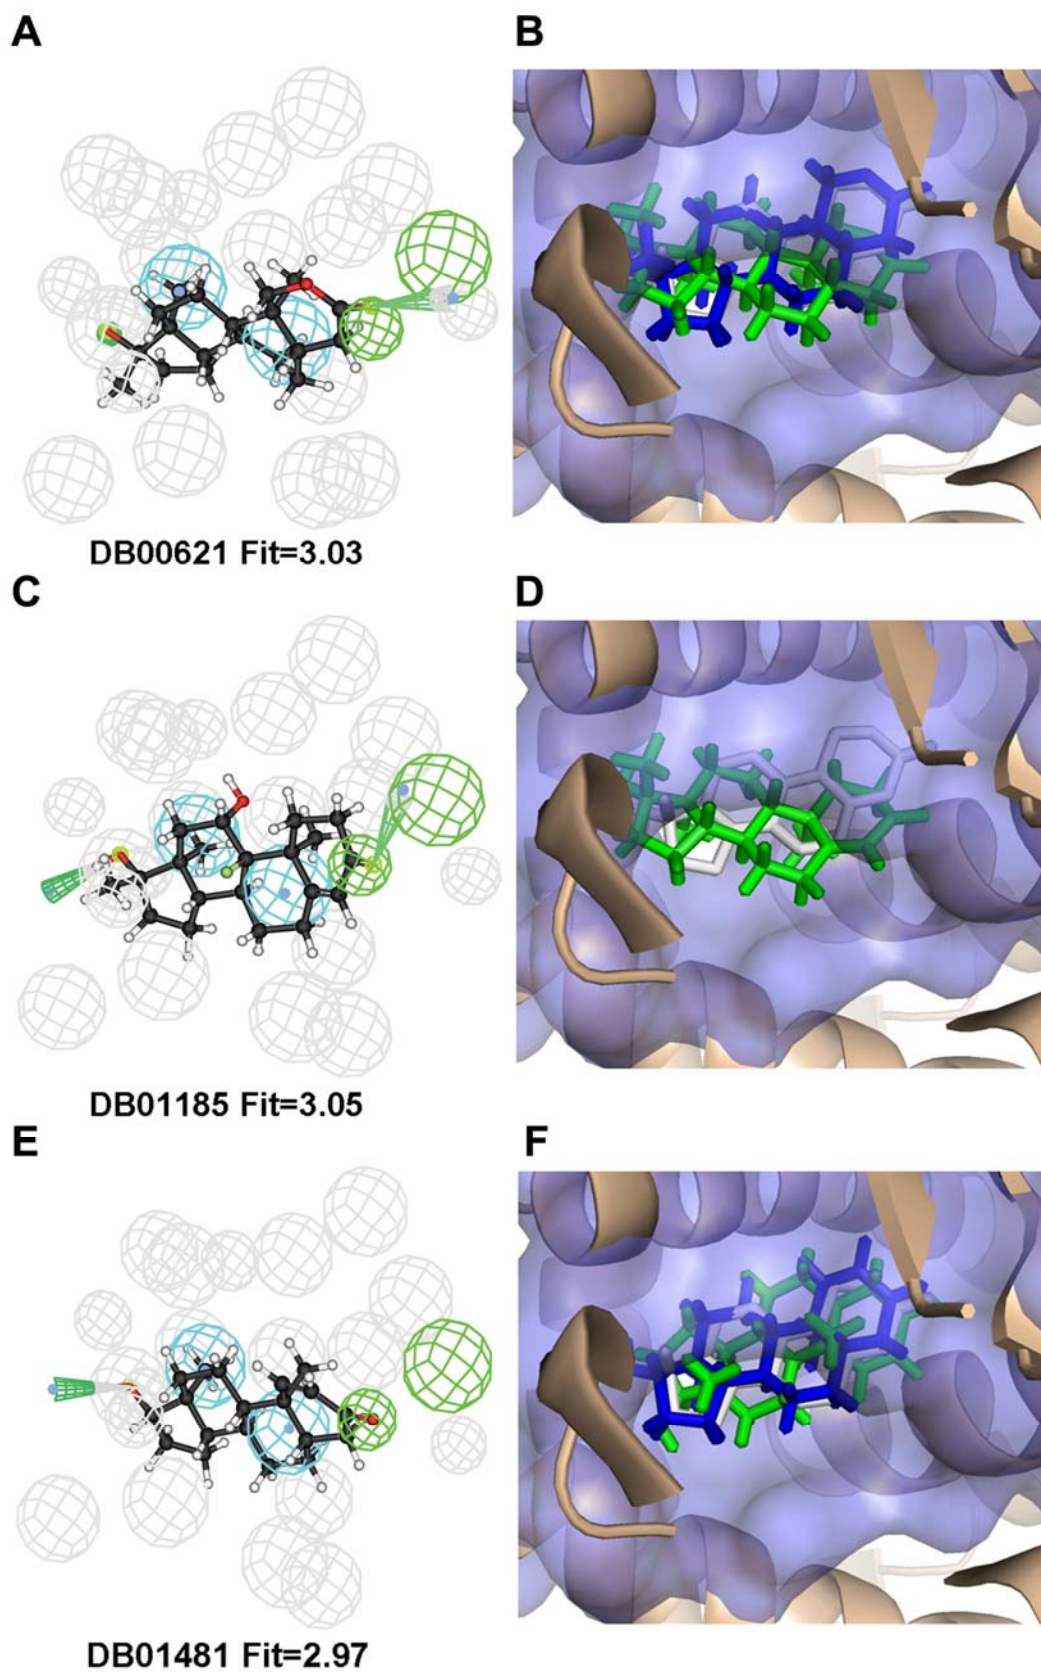

Figure S6 (continued)

**G**

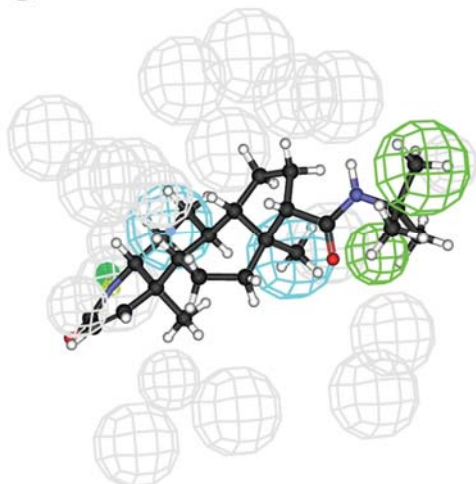

DB01216 Fit=2.95

**H**

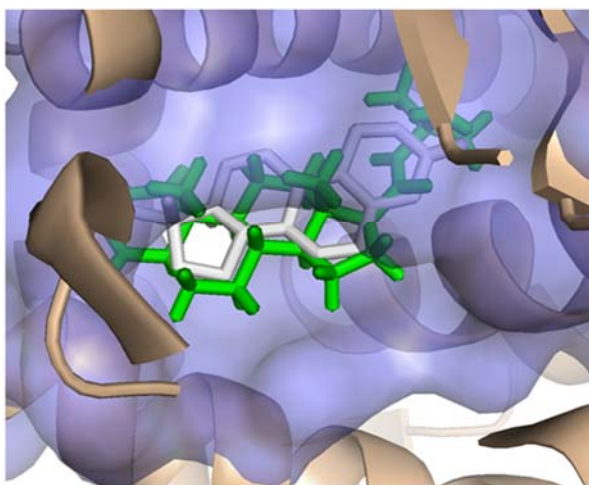

**I**

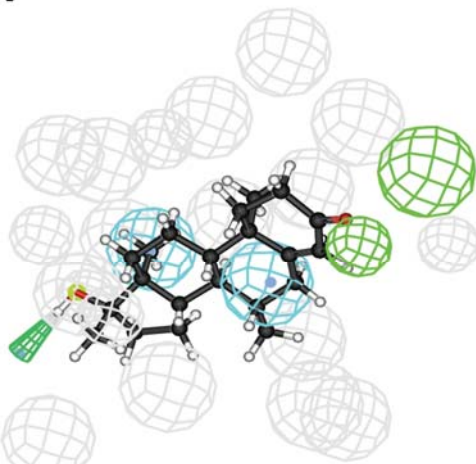

DB01564 Fit=2.99

**J**

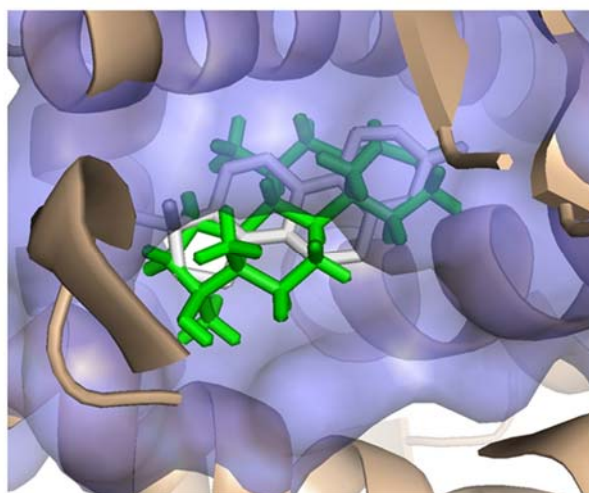

**K**

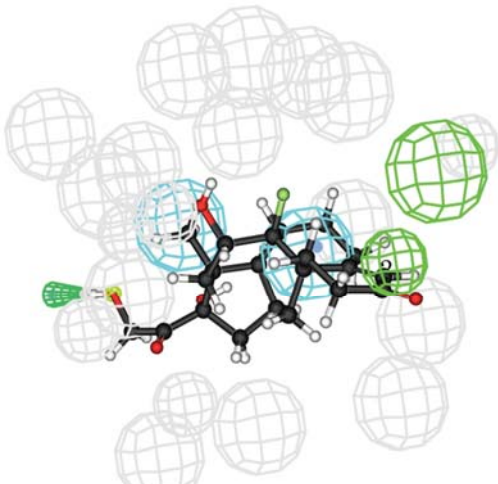

DB02478 Fit=2.71

**L**

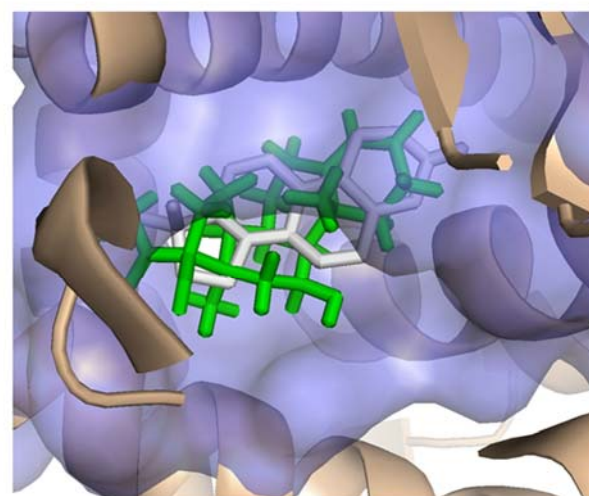

Figure S6 (continued)

**M**

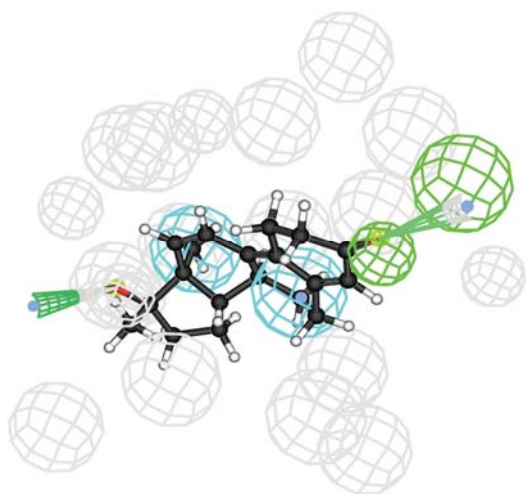

DB02998 Fit=3.45

**O**

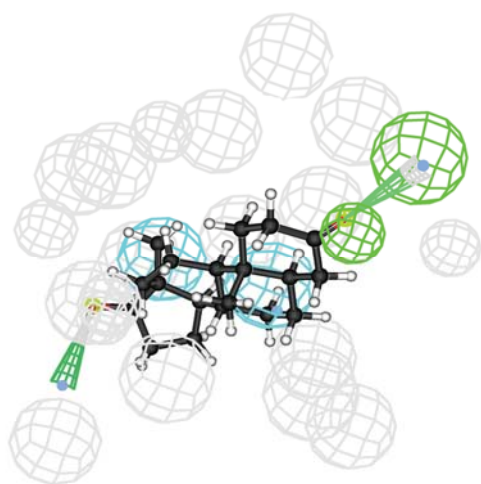

DB02901 Fit=3.06

**N**

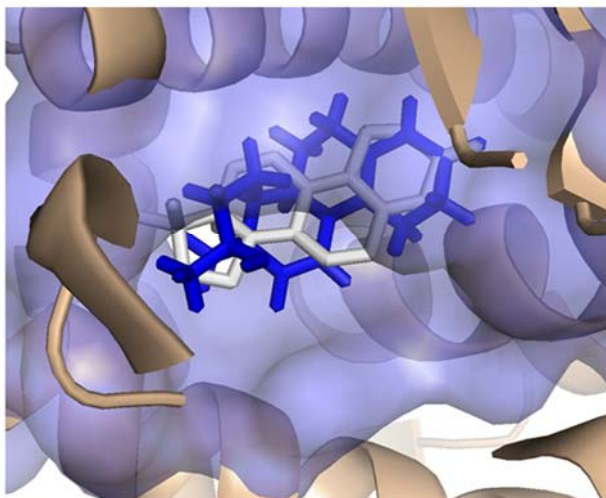

**P**

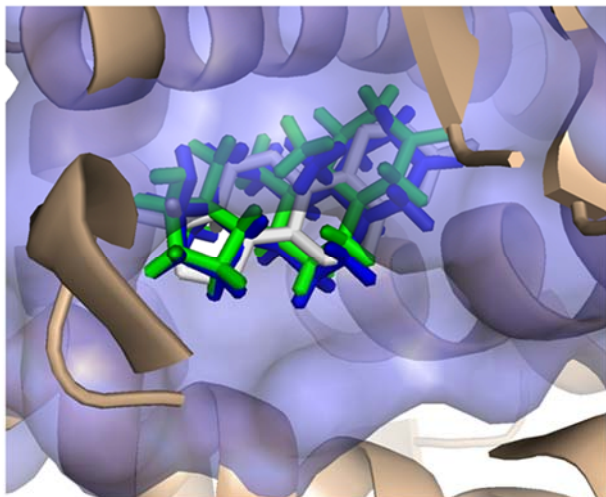

**Figure S7.** Structural superposition of AR actives after pharmacophore mapping and binding pocket fitting. The figure caption is the same as Figure S3.

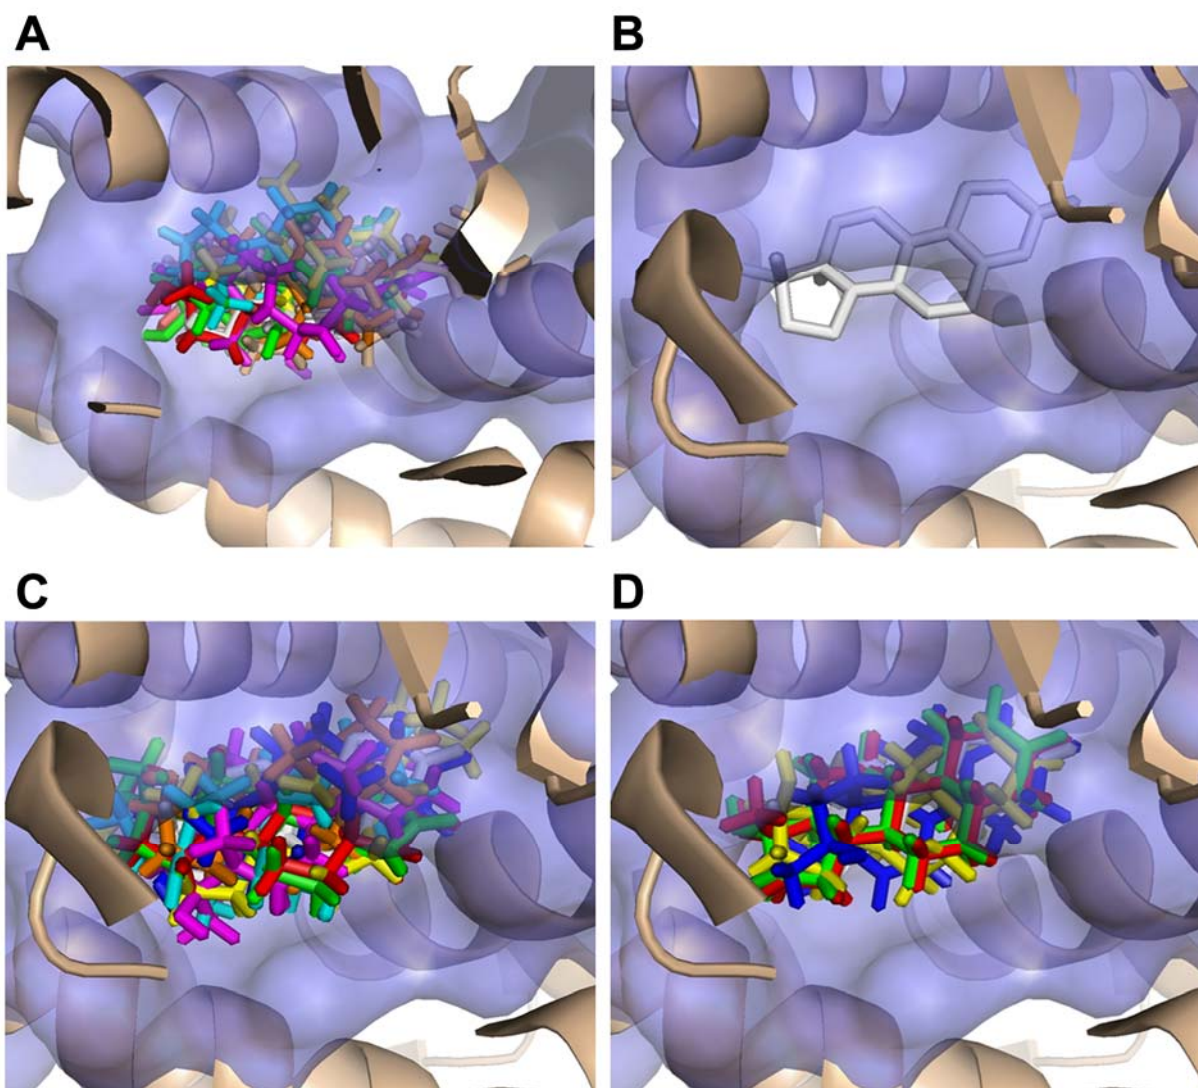

**Figure S8.** Actives mapping to the pharmacophore model and fitting to the binding pocket of DHFR. The figure caption is the same as Figure S2.

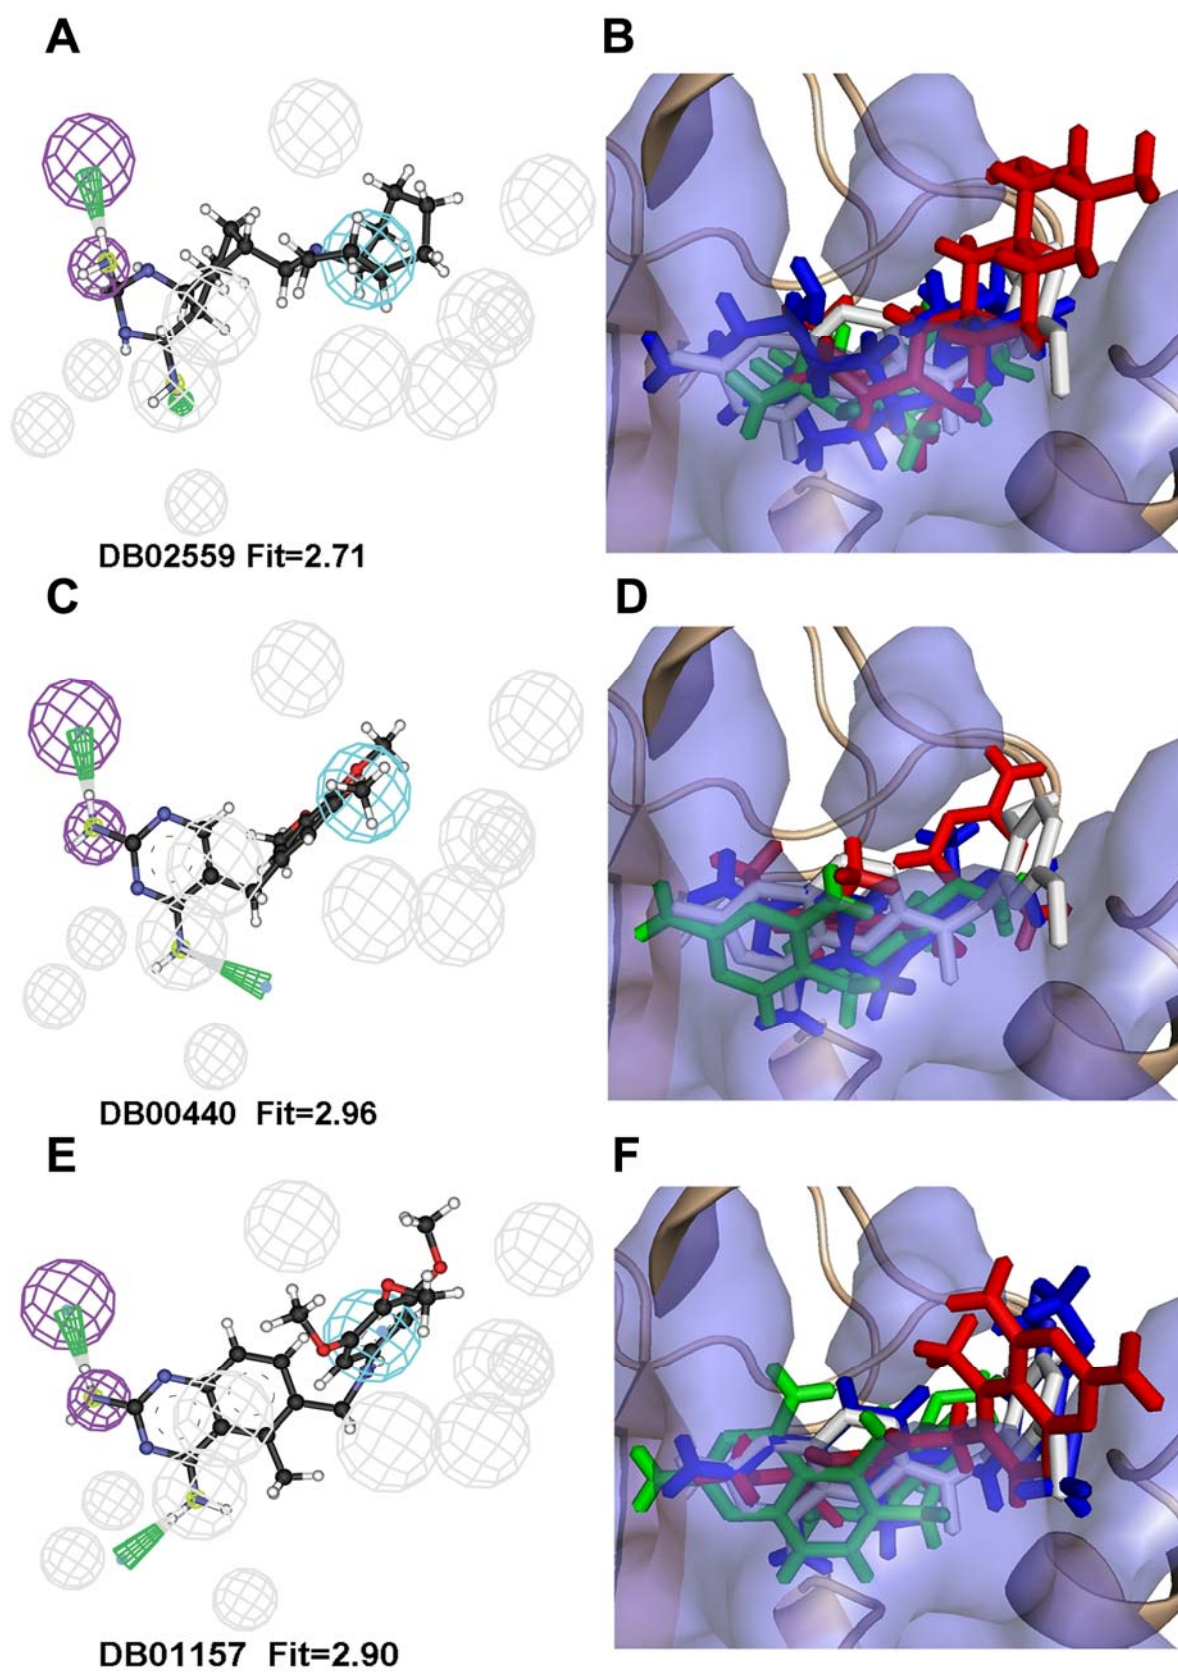

Figure S8 (continued)

**G**

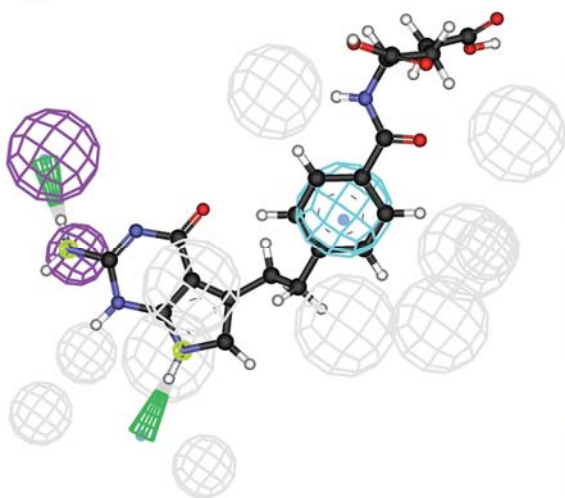

DB00642 Fit=2.76

**H**

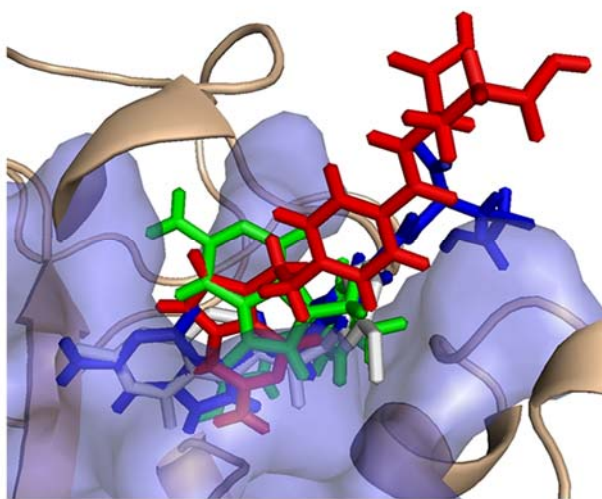

**Figure S9.** Structural superposition of DHFR actives after pharmacophore mapping and binding pocket fitting. The figure caption is the same as Figure S3.

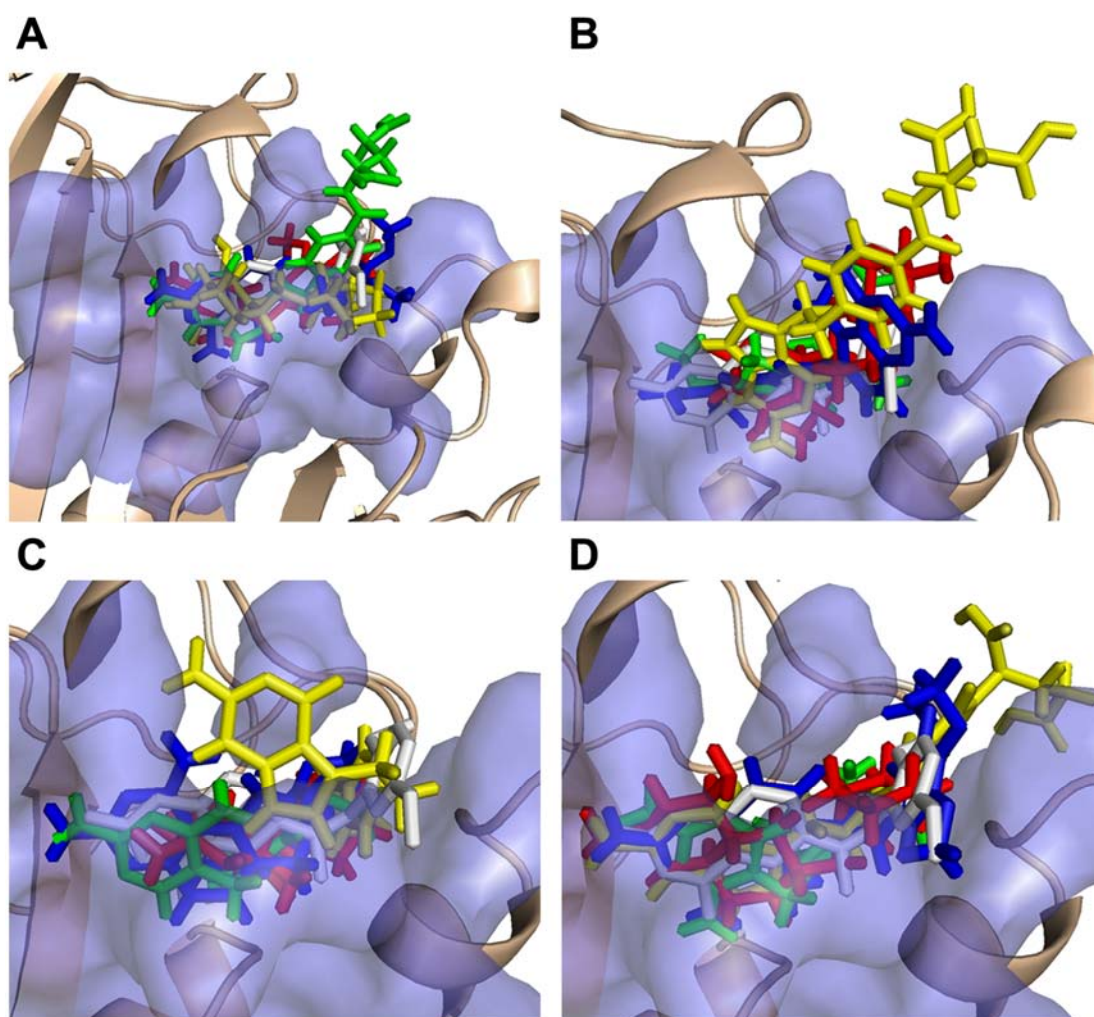



**Figure S10.** Actives mapping to the pharmacophore model and fitting to the binding pocket of DacA. The figure caption is the same as Figure S2.

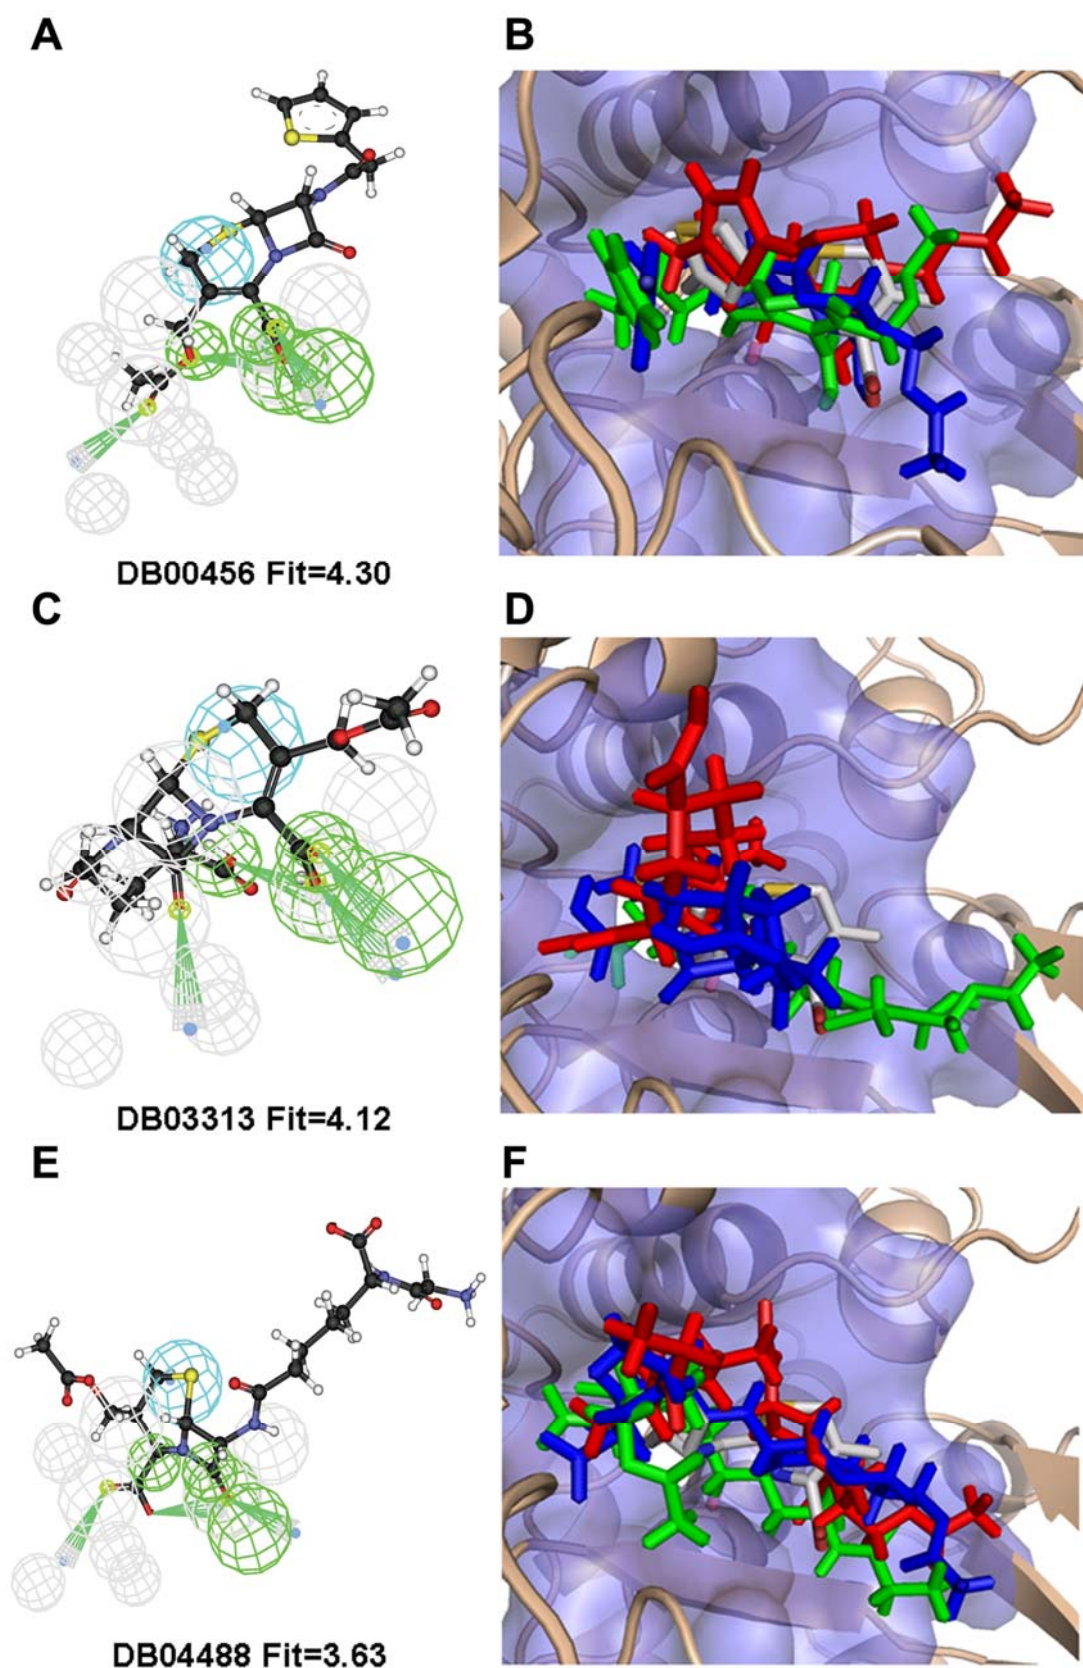

**Figure S11.** Structural superposition of DacA actives after pharmacophore mapping and binding pocket fitting. The figure caption is the same as Figure S3.

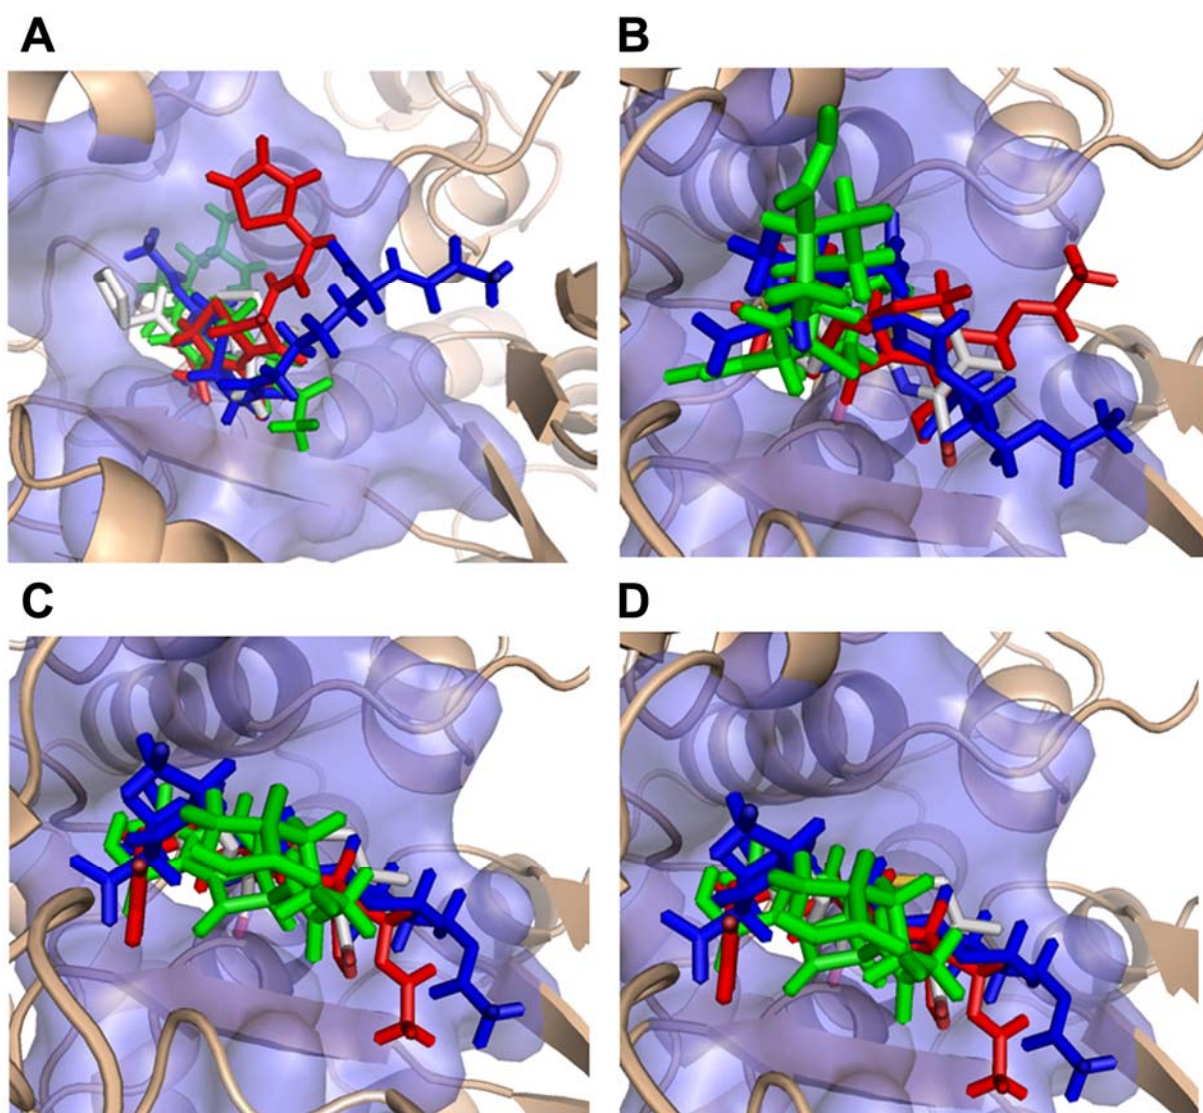

**Figure S12.** Actives mapping to the pharmacophore model and fitting to the binding pocket of HIV-pr. The figure caption is the same as Figure S2.

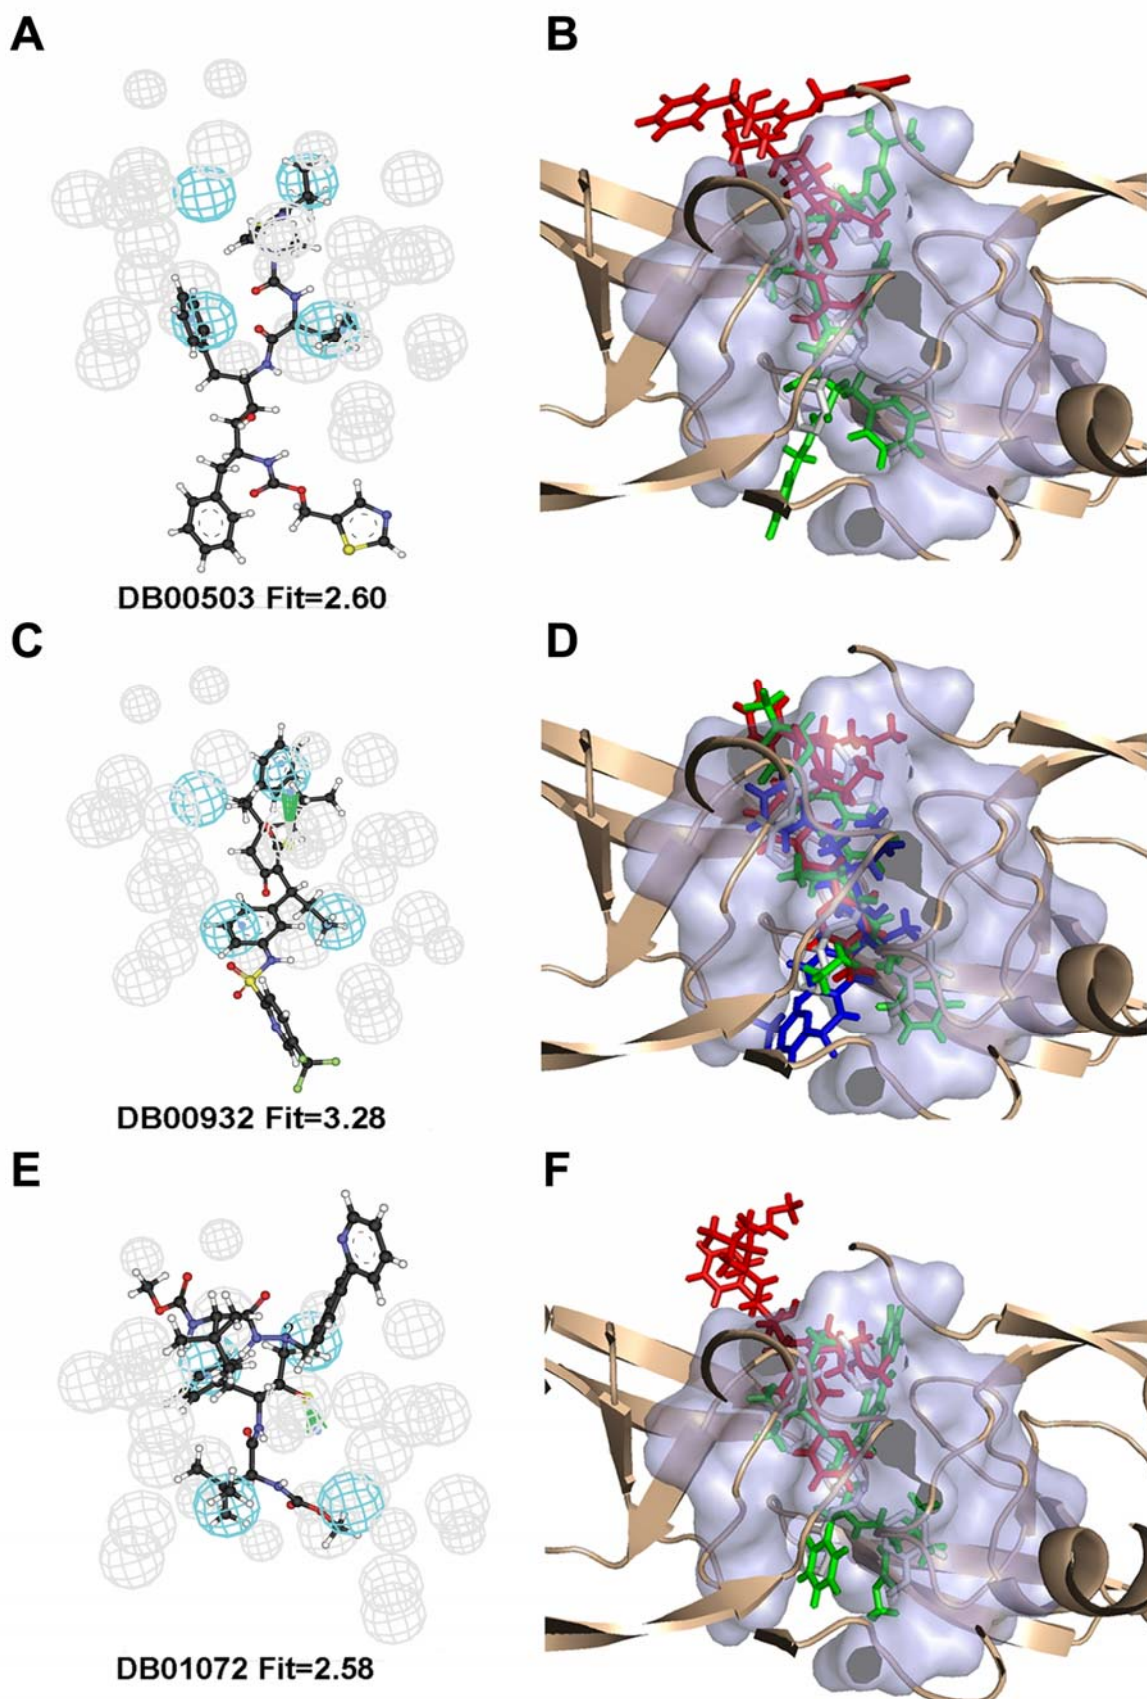

Figure S12 (continued)

**G**

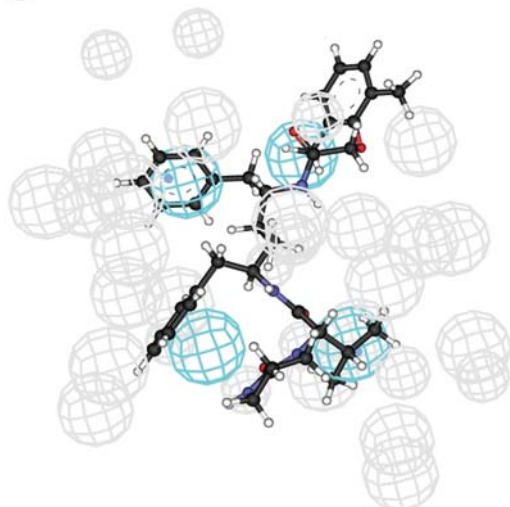

DB01601 Fit=2.59

**H**

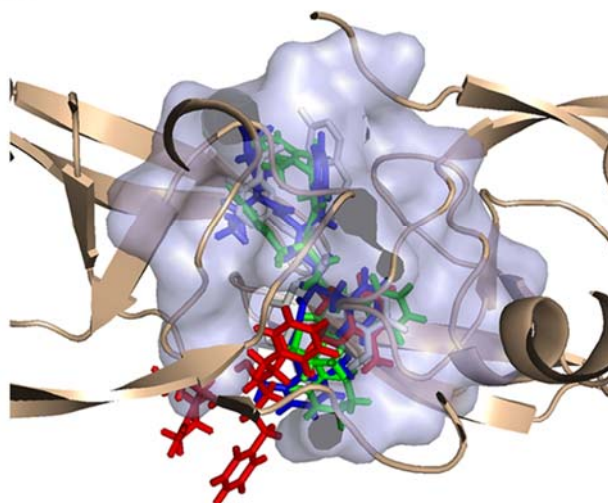

**I**

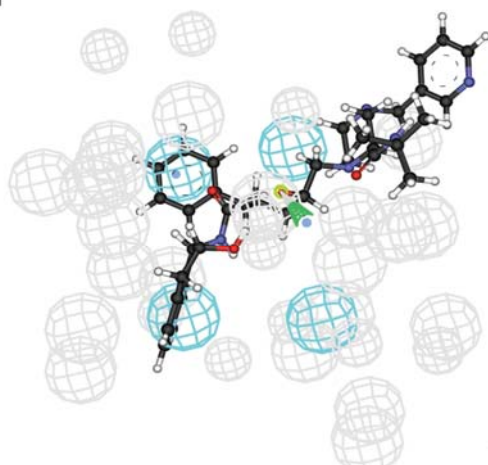

DB00224 Fit=2.40

**J**

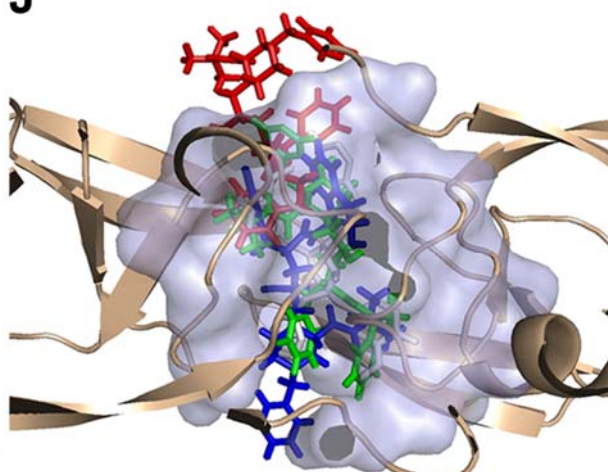

**K**

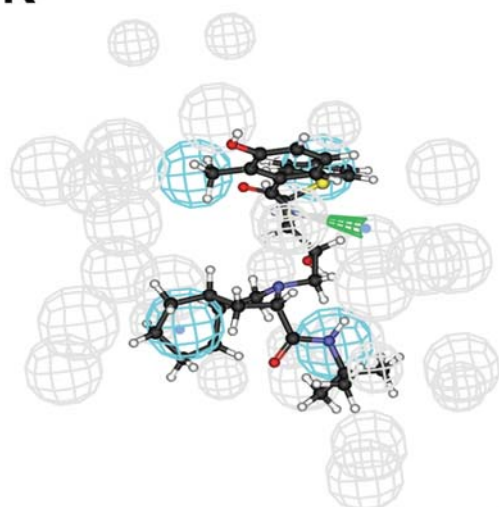

DB00220 Fit=2.87

**L**

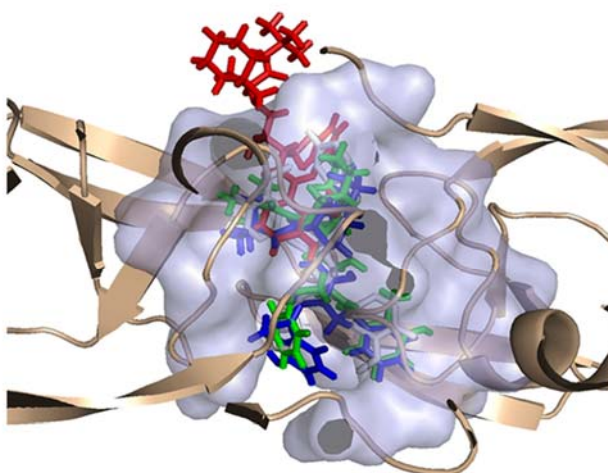

**Figure S13.** Structural superposition of HIV-pr actives after pharmacophore mapping and binding pocket fitting. The figure caption is the same as Figure S3.

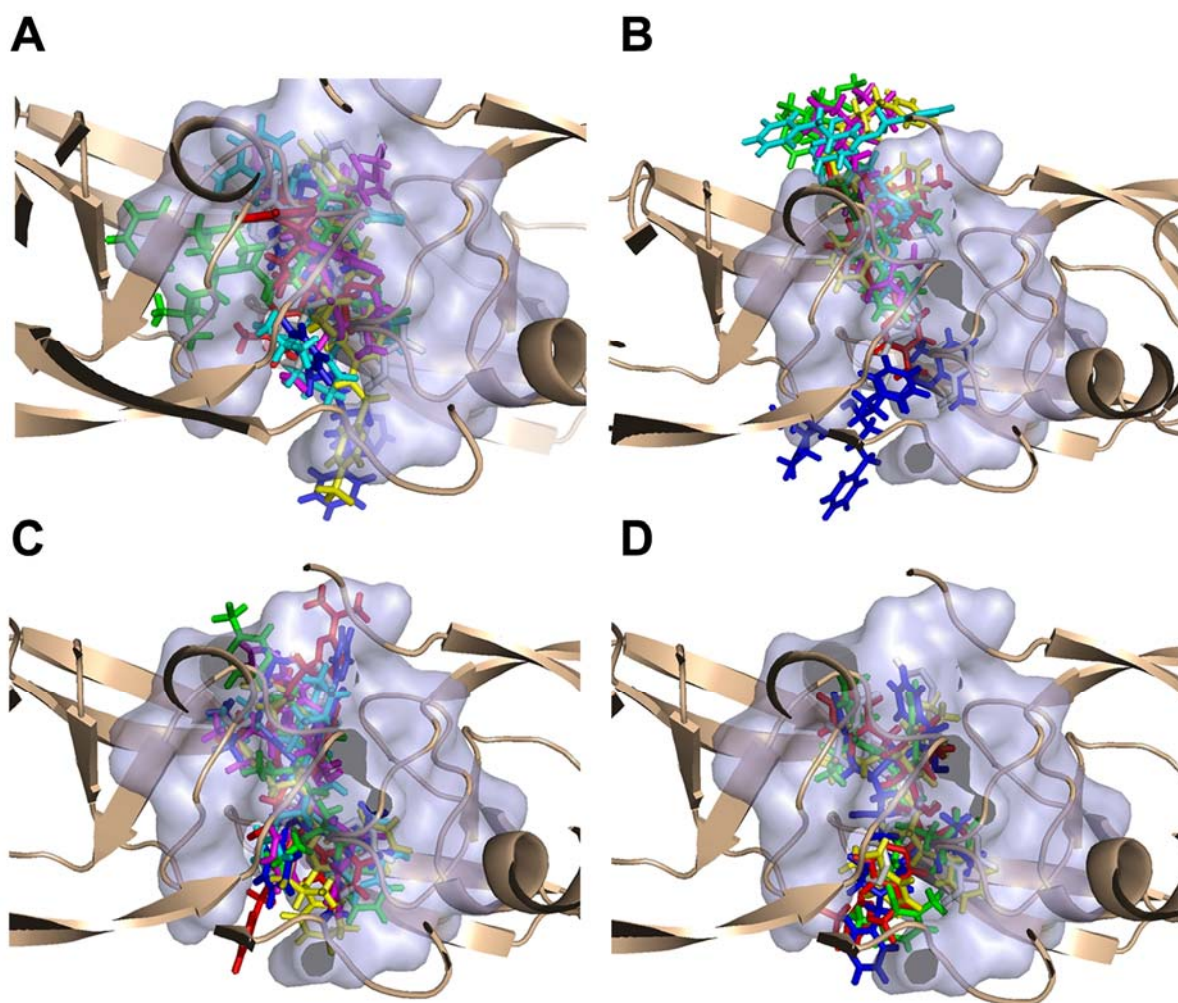

Supplement: aps2009159x1.pdf [file aps2009159x1.pdf]
